# Supplementary material for: Safety and efficacy of N-acetylmannosamine (ManNAc) in patients with GNE myopathy: an open-label phase 2 study
Source: PubMed Central journal article supplement (PMC8553608; doi:10.1038/s41436-021-01259-x), 2021-07-13
Supplement: 41436_2021_1259_MOESM1_ESM.pdf [file 41436_2021_1259_MOESM1_ESM.pdf]

**Supplemental Table 1. Treatment-emergent AEs**

|                                    | <b>Events<br/>(n)</b> | <b>Patients<br/>(n, %)</b> |
|------------------------------------|-----------------------|----------------------------|
| Any serious adverse event          | 0                     | -                          |
| Any adverse event                  | 196                   | 12 (100%)                  |
| Any gastrointestinal adverse event | 25                    | 10 (83.3%)                 |
| Bloating                           | 5                     | 5 (41.7%)                  |
| Diarrhea                           | 5                     | 3 (25.0%)                  |
| Flatulence                         | 11                    | 8 (66.7%)                  |
| Anemia                             | 8                     | 3 (25.0%)                  |
| Fall                               | 6                     | 5 (41.7%)                  |
| ALT increased                      | 18                    | 8 (66.7%)                  |
| AST increased                      | 7                     | 6 (50.0%)                  |
| Bilirubin increased                | 5                     | 1 (8.3%)                   |
| CPK increased                      | 20                    | 10 (83.3%)                 |
| Cholesterol high                   | 4                     | 3 (25.0%)                  |
| GGT increased                      | 3                     | 3 (25%)                    |
| Weight gain                        | 10                    | 5 (41.7%)                  |
| aPPT increased                     | 19                    | 7 (58.3%)                  |
| Hyperglycemia                      | 9                     | 6 (50.0%)                  |
| Hypertriglyceridemia               | 9                     | 4 (33.3%)                  |
| Hypoalbuminemia                    | 5                     | 1 (8.3%)                   |
| Headache                           | 5                     | 3 (25.0%)                  |
| Rash maculo-papular                | 3                     | 2 (16.7%)                  |

Adverse events that occurred after initiation of treatment, with a frequency of more than 20% of patients (i.e. occurring in more than 2 patients).

**Supplemental Table 2. Pharmacokinetic parameters for plasma ManNAc and Neu5Ac**

| Study Day | ManNAc dose | n  | Plasma ManNAc <sup>a</sup> |                                       |                                             |                                   | Plasma Neu5Ac <sup>b</sup> |                                       |                                             |                                   |
|-----------|-------------|----|----------------------------|---------------------------------------|---------------------------------------------|-----------------------------------|----------------------------|---------------------------------------|---------------------------------------------|-----------------------------------|
|           |             |    | T <sub>max</sub> (h)       | C <sub>max</sub> <sup>1</sup> (ng/ml) | AUC <sub>last</sub> <sup>2</sup> (hr*ng/ml) | t <sub>1/2</sub> <sup>3</sup> (h) | T <sub>max</sub> (h)       | C <sub>max</sub> <sup>1</sup> (ng/ml) | AUC <sub>last</sub> <sup>2</sup> (hr*ng/ml) | t <sub>1/2</sub> <sup>3</sup> (h) |
| Day 1     | 3 g BID     | 6  | 2.0                        | 1356                                  | 7438                                        | 3.2                               | 6.0                        | 258                                   | 2506                                        | 14                                |
| Day 1     | 6 g BID     | 6  | 3.0                        | 1672                                  | 10492                                       | 3.5                               | 9.0                        | 259                                   | 2311                                        | *                                 |
| Day 7     | 3 g BID     | 6  | 2.0                        | 1679                                  | 8511                                        | 3.2                               | 8.0                        | 632                                   | 5969                                        | 26                                |
| Day 7     | 6 g BID     | 6  | 2.5                        | 1869                                  | 10506                                       | 2.8                               | 6.0                        | 745                                   | 6649                                        | 28                                |
| Day 90    | 6 g BID     | 12 | 2.0                        | 2152                                  | 11443                                       | 2.7                               | 8.0                        | 802                                   | 7813                                        | 11                                |
| 30 months | 4 g TID     | 8  | 2.0                        | 1631                                  | 31091                                       | *                                 | 24                         | 549                                   | 18,638                                      | *                                 |

Pharmacokinetic parameter calculations conducted without baseline adjustment. SI conversion

for <sup>a</sup>Plasma ManNAc (ng/ml)\*4.517=nmol/L, and <sup>b</sup>Plasma Neu5Ac (ng/ml)\*3.237=nmol/L.

Data are <sup>1</sup>Geometric mean, <sup>2</sup>median, <sup>3</sup>mean. \*Unable to calculate. Dose escalated to 6 g BID

(12 g/day) after Day 7. ManNAc intake stopped for 5-7 days before PK evaluations of a 4 g

TID at the 30-month visit. **Abbreviations:** AUC<sub>last</sub>=area under the plasma concentration-

versus time curve from time 0 (dosing) to the time of last quantifiable concentration.

BID=twice daily. C<sub>max</sub>=maximum observed plasma concentration. t<sub>1/2</sub>=apparent terminal-

phase half-life. TID=three times daily. T<sub>max</sub>=time to maximum observed plasma

concentration.

**Supplemental Table 3. Rate of decline for various clinical outcome measures**

|                               | <b>Natural History<br/>annual change<br/>Mean (SD)<br/><i>Quintana et al.</i></b> | <b>ManNAc phase 2<br/>annual change<br/>Mean (SD)</b> | <b>P-value</b> |
|-------------------------------|-----------------------------------------------------------------------------------|-------------------------------------------------------|----------------|
| Upper extremity strength (kg) | -4.52 (10.2)                                                                      | 0.21 (9.86)                                           | 0.0139         |
| Lower extremity strength (kg) | -9.55 (20.6)                                                                      | -0.38 (18.83)                                         | 0.0006         |
| 6MWT (meters)                 | -10.70 (32.7)                                                                     | -10.81 (47.67)                                        | NA             |
| AMAT total score              | -1.47 (2.52)                                                                      | -0.83 (2.07)                                          | 0.0453         |
| AMAT endurance score          | -0.53 (1.41)                                                                      | -0.47 (1.31)                                          | 0.7365         |
| AMAT functional score         | -0.90 (1.69)                                                                      | -0.36 (1.13)                                          | 0.0079         |
| HAP adjusted activity score   | -1.11 (5.52)                                                                      | -2.86 (5.53)                                          | NA             |
| HAP maximum activity score    | -3.24 (7.96)                                                                      | -1.44 (7.65)                                          | 0.1337         |
| IBMFRS Total Score            | -0.49 (1.65)                                                                      | -1.59 (2.46)                                          | NA             |

The estimated annual change for various clinical outcome measures estimated by fitting a linear model in the change from baseline as a function of the length of follow-up in patients treated with ManNAc compared to our previously published natural history estimates (*Quintana et al. 2019*) using least squares regression to estimate whether the rate of decline slowed significantly (P-value) compared to natural history.

6MWT=6-minute walk test. AMAT=Adult Myopathy Assessment Tool. HAP=Human Activity Profile. IBMFRS=Inclusion Body Myositis Functional Rating Scale. NA=not applicable.

**A**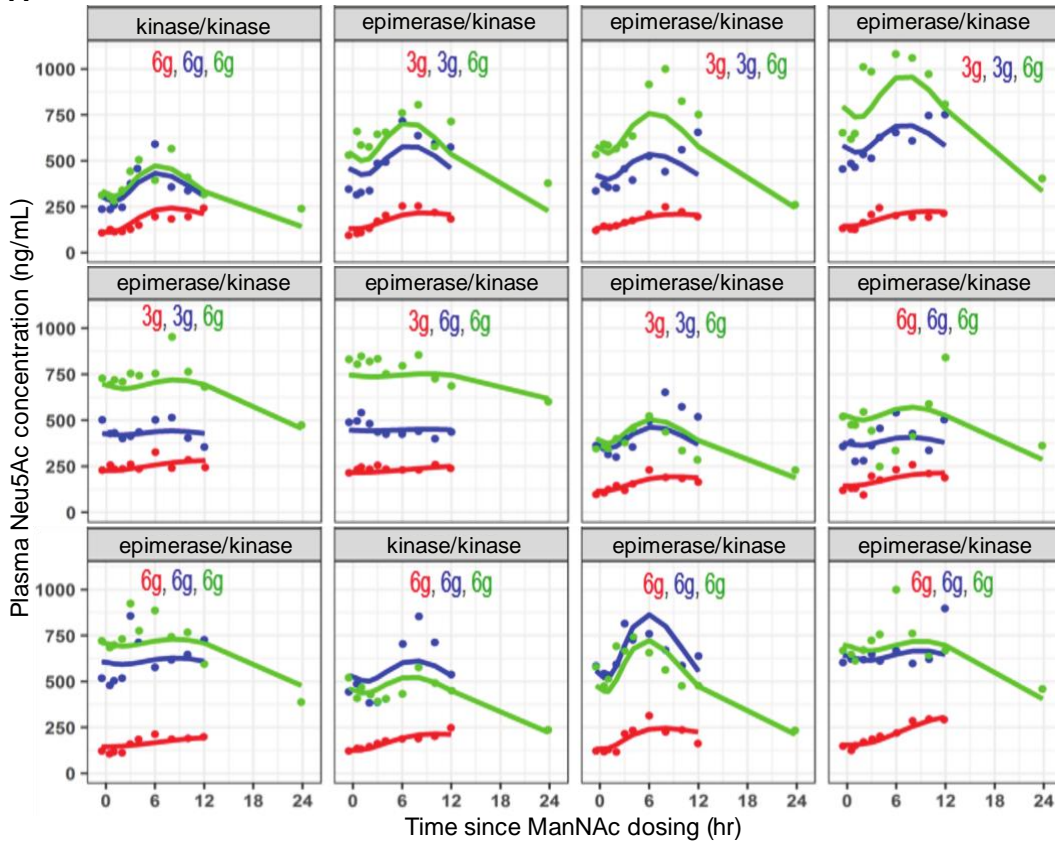**B**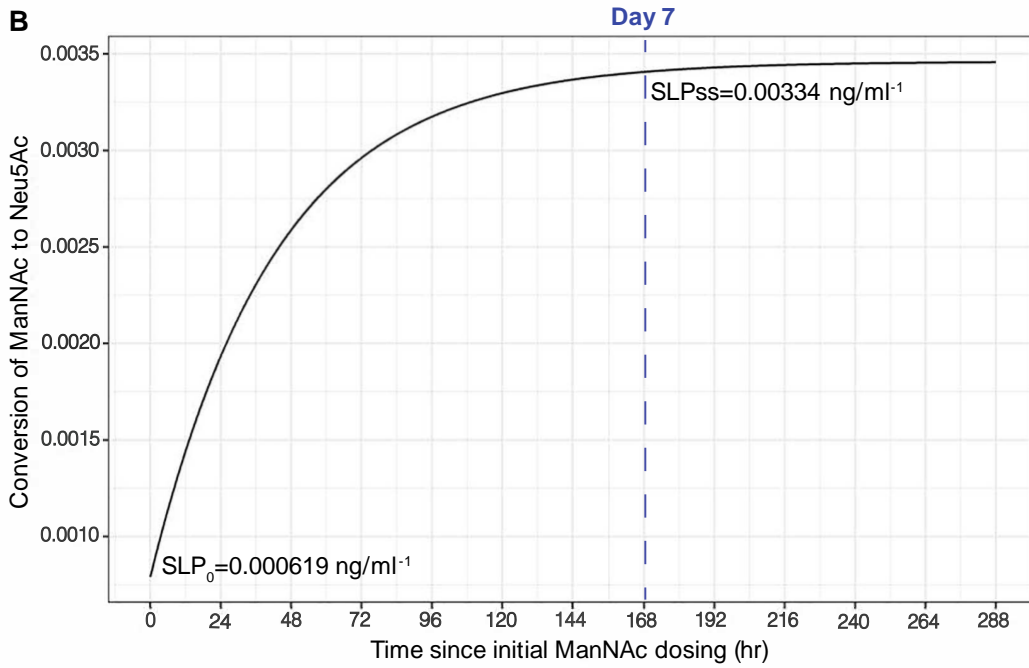

**Supplemental Fig. 1. (A)** Individual post-hoc predicted profiles for plasma Neu5Ac concentrations using the population PK/PD model overlaid upon the observed (symbols) concentration-time data on Day 1 (*red*), Day 7 (*blue*) and Day 90 (*green*) at ManNAc doses of 3 g BID or 6 g BID. The *GNE* domains (epimerase or kinase) affected in each patient are indicated. SI conversion for plasma Neu5Ac (ng/ml)\*3.237=nmol/L.

(B) Plot of the conversion of ManNAc to Neu5Ac as a function of duration of treatment. The efficiency of Neu5Ac production reaches steady-state (SLPSS) ~7 days after initial dosing.

Abbreviations: BID: twice daily. Neu5Ac: N-acetylneuraminic acid. SLP0: conversion of ManNAc to Neu5Ac at time 0. SLPss: conversion of ManNAc to Neu5Ac at steady-state.
